# Supplementary material for: Co-occurrence of seagrass vegetation and coral colonies supports unique fish assemblages: a microhabitat-scale perspective
Source: PeerJ. 2022 Nov 23;10:e14466. doi: 10.7717/peerj.14466 (PMC9700455; doi:10.7717/peerj.14466)
Supplement: Supplemental Information 2 [file peerj-10-14466-s002.xls]

## Sheet: Sheet1
Number of Individuals
	SGCO				CO				SG
	Average	Standard deviation			Average	Standard deviation			Average	Standard deviation			Average	Standard deviation
JUN 2018	84.5	32.3651		JUN 2018	5.16667	3.43026		JUN 2018	21.8333	48.7459		JUN 2018	0.166667	0.408248
JUL 2018	47.8333	24.3919		JUL 2018	7.83333	7.13909		JUL 2018	0	0		JUL 2018	0.5	0.83666
AUG 2018	58.8333	35.0281		AUG 2018	26	29.0448		AUG 2018	3.16667	6.79461		AUG 2018	0	0
SEP 2018	53.6667	27.2005		SEP 2018	11.8333	7.96032		SEP 2018	10.8333	25.0952		SEP 2018	0.666667	0.816497
OCT 2018	32.1667	10.9072		OCT 2018	6.66667	5.04645		OCT 2018	0.166667	0.408248		OCT 2018	0.333333	0.816497
JUN 2019	303.333	142.897		JUN 2019	22.6667	22.6598		JUN 2019	190.333	121.335		JUN 2019	3.5	3.72827
JUL 2019	258	110.965		JUL 2019	28.8333	44.6068		JUL 2019	92.5	137.391		JUL 2019	5.66667	5.20256
AUG 2019	98.8333	35.2103		AUG 2019	12.5	8.89382		AUG 2019	11.1667	19.8838		AUG 2019	0	0
SEP 2019	51.6667	21.8785		SEP 2019	14.5	16.778		SEP 2019	0.333333	0.816497		SEP 2019	0.666667	1.0328
OCT 2019	57	35.9555		OCT 2019	7.66667	7.20185		OCT 2019	0.166667	0.408248		OCT 2019	0.166667	0.408248
Number of Species
	SGCO				CO				SG
	Average	Standard deviation			Average	Standard deviation			Average	Standard deviation			Average	Standard deviation
JUN 2018	7	2.09762		JUN 2018	2.16667	1.32916		JUN 2018	0.5	0.83666		JUN 2018	0.166667	0.408248
JUL 2018	6.83333	2.48328		JUL 2018	4	2.52982		JUL 2018	0	0		JUL 2018	0.5	0.83666
AUG 2018	7.16667	1.47196		AUG 2018	3.66667	1.96638		AUG 2018	1	1.54919		AUG 2018	0	0
SEP 2018	8.33333	1.75119		SEP 2018	3.5	2.16795		SEP 2018	0.666667	1.0328		SEP 2018	0.666667	0.816497
OCT 2018	6	3.16228		OCT 2018	4.16667	2.2286		OCT 2018	0.166667	0.408248		OCT 2018	0.166667	0.408248
JUN 2019	11.5	2.42899		JUN 2019	5.16667	2.92689		JUN 2019	3	1.41421		JUN 2019	1.5	1.3784
JUL 2019	10.3333	3.82971		JUL 2019	6.16667	3.54495		JUL 2019	2.5	2.50998		JUL 2019	2.33333	2.06559
AUG 2019	8.33333	1.8619		AUG 2019	5.16667	2.63944		AUG 2019	1.16667	1.83485		AUG 2019	0	0
SEP 2019	7	1.41421		SEP 2019	4	3.28634		SEP 2019	0.166667	0.408248		SEP 2019	0.333333	0.516398
OCT 2019	5.83333	1.47196		OCT 2019	4.33333	2.50333		OCT 2019	0.166667	0.408248		OCT 2019	0.166667	0.408248
