# Supplementary material for: Co-occurrence of seagrass vegetation and coral colonies supports unique fish assemblages: a microhabitat-scale perspective
Source: PeerJ. 2022 Nov 23;10:e14466. doi: 10.7717/peerj.14466 (PMC9700455; doi:10.7717/peerj.14466)
Supplement: Supplemental Information 3 [file peerj-10-14466-s003.xls]

## Sheet: Sheet1
	Month =>	JUN 2018	JUN 2018	JUN 2018	JUN 2018	JUL 2018	JUL 2018	JUL 2018	JUL 2018	AUG 2018	AUG 2018	AUG 2018	AUG 2018	SEP 2018	SEP 2018	SEP 2018	SEP 2018	OCT 2018	OCT 2018	OCT 2018	OCT 2018	JUN 2019	JUN 2019	JUN 2019	JUN 2019	JUL 2019	JUL 2019	JUL 2019	JUL 2019	AUG 2019	AUG 2019	AUG 2019	AUG 2019	SEP 2019	SEP 2019	SEP 2019	SEP 2019	OCT 2019	OCT 2019	OCT 2019	OCT 2019
Species	Habitat zones =>	SGCO	SG	CO	SA	SGCO	SG	CO	SA	SGCO	SG	CO	SA	SGCO	SG	CO	SA	SGCO	SG	CO	SA	SGCO	SG	CO	SA	SGCO	SG	CO	SA	SGCO	SG	CO	SA	SGCO	SG	CO	SA	SGCO	SG	CO	SA
Siganus fuscescens		18.3333	21.6667	0	0	2.16667	0	0	0	26.6667	0	0	0	12.3333	7.16667	0.166667	0	0.333333	0	0	0	207.833	186.333	0	1.33333	124	82.6667	0	3.5	11.1667	9.16667	0	0	0	0	0	0	0	0	0	0
Ostorhinchus properuptus		21.6667	0	0	0	12.3333	0	1.66667	0	1.66667	0	0	0	7.33333	0	1.16667	0	3.16667	0	0	0	55.3333	0	12.3333	0	42.5	0	18.5	0	31.3333	0	2.16667	0	12.1667	0	2	0	11.3333	0	1.33333	0
Ostorhinchus ishigakiensis		2.16667	0	0	0	9.83333	0	0	0	7.66667	0	0	0	13.5	0	0	0	10.6667	0	0	0	18.3333	1.33333	0	0	59.3333	2.66667	0	0	37.1667	0	0	0	25.8333	0	0	0	28.6667	0	0	0
Lutjanus gibbus		31.1667	0	0	0.166667	14	0	0	0	9.66667	0	0	0	5.83333	0	0	0	8.5	0	0	0	4.66667	0	0	0	12.1667	0	0	0	9.16667	0	0	0	3.16667	0	0	0	10.5	0	0	0
Mulloidichthys flavolineatus		0	0	0	0	0	0	0	0	0	0	18.3333	0	0	0	0.666667	0	0	0	0	0	0	0	0	0	0	0	0	0	0	0	2	0	0	0	6.5	0	0	0	0.166667	0
Pomacentrus sp.1		0	0	0.5	0	0.166667	0	2.33333	0	0	0	1.5	0	0	0	1.66667	0	0	0	1.83333	0	0.166667	0	4.66667	0	0.166667	0	2.66667	0	0	0	2.66667	0	0	0	2	0	0	0	1.83333	0
Stethojulis strigiventer		0	0	0	0	1.33333	0	0	0	2.33333	1.66667	0	0	2.16667	0	0	0	3.5	0	0	0	0.333333	0	0	0	0	0	0	0	0	0.666667	0	0	3.33333	0	0	0	1.5	0	0	0
Parupeneus barberinus		0.166667	0.166667	0	0	0	0	0	0	4.33333	0.166667	0	0	4.83333	3.66667	0	0	0.5	0	0.166667	0	0.166667	0.166667	0	0	0.333333	0.5	0	0	0.166667	0.5	0	0	0	0	0	0	0.333333	0	0	0
Cheilodipterus quinquelineatus		0.166667	0	0	0	1	0	0	0	0.166667	0	0	0	0.166667	0	5.5	0	0	0	1.33333	0	0.833333	0	1.66667	0	0.5	0	1.16667	0	0.666667	0	1.83333	0	0.166667	0	0.166667	0	0	0	0.666667	0
Parupeneus barberinoides		0	0	0	0	0.166667	0	0	0	0.5	0	0	0	0.666667	0	0	0	0	0	0	0	2.5	0.666667	0	0	0.333333	4.66667	0	0	1	0	0	0	0.5	0	0	0	0.333333	0	0	0
Acanthurus nigrofuscus		0	0	1.83333	0	0	0	0.5	0	0	0	0.166667	0	0	0	0	0	0	0	0.333333	0	0.166667	0	0.166667	0	1.16667	0	0.666667	0.166667	2.5	0	0.833333	0	0.5	0	1	0	0	0	0.666667	0
Parupeneus multifasciatus		1.16667	0	0	0	1.16667	0	0.166667	0	1.83333	0.666667	0	0	0.333333	0	0	0	0	0	0.166667	0	0	0	0	0	0	0	0	0	1.66667	0	0.333333	0	2	0	0	0	0	0	0.166667	0
Pterocaesio sp.1		0.833333	0	0	0	0	0	0	0	0	0	3.33333	0	0	0	0	0	0	0	0	0	1.83333	0	0	0	1.5	0	0.666667	0	0	0	0	0	0	0	0	0	0	0	0	0
Rhabdamia sp.1		0.666667	0	0	0	0	0	0	0	0	0	0	0	0	0	0	0	0	0	0	0	0	0	0	0	7.16667	0	0	0	0	0	0	0	0	0	0	0	0	0	0	0
Chrysiptera cyanea		0	0	0.666667	0	0	0	0.5	0	0	0	0.666667	0	0	0	0.333333	0	0	0	0.333333	0	0.5	0	0.833333	0	1.16667	0	0	0	0.833333	0	0	0	1.16667	0	0	0	0.833333	0	0	0
Abudefduf sexfasciatus		1.66667	0	0	0	0	0	0	0	0	0	0	0	0	0	0	0	0	0	0	0	2.83333	0	0	0	2.66667	0	0	0	0.333333	0	0	0	0	0	0	0	0	0	0	0
Pomacentrus chrysurus		0.333333	0	0.166667	0	0.5	0	0.166667	0	0.666667	0	0	0	0.333333	0	0	0	0.666667	0	0	0	0.333333	0	0.5	0	0.5	0	0.5	0	0.333333	0	0.166667	0	0.5	0	0.166667	0	0.833333	0	0.333333	0
Lethrinus harak		0.166667	0	0	0	0	0	0	0	0.5	0.333333	0	0	0.166667	0	0.333333	0.166667	0.166667	0.166667	0.166667	0	0.5	0	0	0	0.333333	0.166667	0.833333	0	0	0.5	0	0	0.333333	0.333333	0.5	0	0.5	0	0.166667	0
Lethrinus atkinsoni		0.166667	0	0	0	0.166667	0	0	0	0.5	0	0	0	0.833333	0	0	0	0.5	0	0	0	0.833333	0.666667	0	0	0.166667	0.833333	0	0	0.5	0	0	0	0	0	0	0	0	0	0	0
Dischistodus prosopotaenia		0	0	0	0	0	0	0.833333	0	0	0	0.166667	0	0.166667	0	0.333333	0	0	0	0.333333	0	0	0	0.5	0	0.166667	0	0.333333	0	0.5	0	0.333333	0	0.333333	0	0.333333	0	0.166667	0	0.5	0
Lutjanus kasmira		1.33333	0	0	0	1.83333	0	0.166667	0	0.333333	0	0	0	0.666667	0	0	0	0.666667	0	0	0	0	0	0	0	0	0	0	0	0	0	0	0	0	0	0	0	0	0	0	0
Chaetodon auriga		0.166667	0	0.333333	0	0.166667	0	0.5	0	0.5	0	0.333333	0	0.333333	0	0.166667	0	0.333333	0	0.166667	0	0.5	0	0	0	0.5	0	0	0	0.166667	0	0	0	0	0	0.166667	0	0.5	0	0	0
Lethrinus obsoletus		0	0	0	0	0.166667	0	0	0	0	0	0	0	0.166667	0	0	0	0.333333	0	0	0	0.166667	1	0	0.166667	0.333333	0.833333	0	0	0.333333	0	0	0	0.166667	0	0	0	0.166667	0	0	0
Lethrinus nebulosus		0	0	0.666667	0	1	0	0.166667	0	0	0	0	0	0.166667	0	0.333333	0	0.166667	0	0.166667	0	0	0	0	0	0	0	0	0	0.166667	0.333333	0	0	0.333333	0	0	0	0	0	0	0
Amblyeleotris sp.1		0	0	0	0	0	0	0	0.166667	0	0	0	0	0	0	0	0.333333	0	0	0	0.333333	0	0	0	1.16667	0	0	0	0.666667	0	0	0	0	0	0	0	0.666667	0	0	0	0.166667
Parupeneus ciliatus		0.333333	0	0	0	0	0	0	0	0	0	0	0	0	0	0	0	0	0	0	0	1.5	0	0	0	0	0	1.16667	0	0.166667	0	0	0	0.166667	0	0	0	0	0	0	0
