# Supplementary material for: Co-occurrence of seagrass vegetation and coral colonies supports unique fish assemblages: a microhabitat-scale perspective
Source: PeerJ. 2022 Nov 23;10:e14466. doi: 10.7717/peerj.14466 (PMC9700455; doi:10.7717/peerj.14466)
Supplement: Supplemental Information 4 [file peerj-10-14466-s004.xls]

## Sheet: Sheet1
Species	PCA axis 1	PCA axis 2
Siganus fuscescens	0.561	-0.762
Ostorhinchus properuptus	0.445	0.447
Ostorhinchus ishigakiensis	0.515	0.25
Lutjanus gibbus	0.392	0.264
Mulloidichthys flavolineatus	-0.061	0.049
Pomacentrus sp.1	-0.068	0.125
Stethojulis strigiventer	0.077	0.116
Parupeneus barberinus	0.072	-0.075
Cheilodipterus quinquelineatus	0.015	0.092
Parupeneus barberinoides	0.1	-0.089
Acanthurus nigrofuscus	0.024	0.069
Parupeneus multifasciatus	0.063	0.076
Pterocaesio sp.1	0.052	0.001
Rhabdamia sp.1	0.075	-0.004
Chrysiptera cyanea	0.042	0.075
Abudefduf sexfasciatus	0.103	-0.014
Pomacentrus chrysurus	0.053	0.079
Lethrinus harak	0.021	0.023
Lethrinus atkinsoni	0.062	-0.047
Dischistodus prosopotaenia	-0.002	0.056
Lutjanus kasmira	0.042	0.041
Chaetodon auriga	0.036	0.026
Lethrinus obsoletus	0.038	-0.042
Lethrinus nebulosus	0.007	0.032
Amblyeleotris sp.1	-0.022	-0.017
Parupeneus ciliatus	0.034	0.013
Habitat zones + Month	PCA axis 1	PCA axis 2
COSGJUN 2018	3.41	0.383
SGJUN 2018	-0.149	-2.46
COJUN 2018	-1.87	0.131
SAJUN 2018	-1.85	-0.0259
COSGJUL 2018	2.4	1.84
COJUL 2018	-1.49	0.66
SAJUL 2018	-1.91	-0.0692
COSGAUG 2018	2.84	-0.87
SGAUG 2018	-1.79	0.0807
COAUG 2018	-2.04	0.26
COSGSEP 2018	3	0.108
SGSEP 2018	-0.621	-1.78
COSEP 2018	-1.52	0.538
SASEP 2018	-1.91	-0.0681
COSGOCT 2018	1.28	1.75
SGOCT 2018	-1.91	-0.0631
COOCT 2018	-1.92	0.211
SAOCT 2018	-1.92	-0.0716
COSGJUN 2019	5.57	-1.11
SGJUN 2019	1.58	-3.95
COJUN 2019	-0.811	1.51
SAJUN 2019	-1.45	-0.732
COSGJUL 2019	6.1	-0.22
SGJUL 2019	1.51	-3.35
COJUL 2019	-0.566	1.6
SAJUL 2019	-1.07	-1.21
COSGAUG 2019	4.12	1.31
SGAUG 2019	-0.53	-1.79
COAUG 2019	-1.5	0.852
COSGSEP 2019	1.8	2.66
SGSEP 2019	-1.9	-0.0601
COSEP 2019	-1.58	0.764
SASEP 2019	-1.92	-0.0755
COSGOCT 2019	2.12	2.72
COOCT 2019	-1.57	0.593
SAOCT 2019	-1.91	-0.0692
