# Supplementary material for: Co-occurrence of seagrass vegetation and coral colonies supports unique fish assemblages: a microhabitat-scale perspective
Source: PeerJ. 2022 Nov 23;10:e14466. doi: 10.7717/peerj.14466 (PMC9700455; doi:10.7717/peerj.14466)
Supplement: Supplemental Information 5 [file peerj-10-14466-s005.xls]

## Sheet: Sheet1
				Average Number of Individuaos for Each species
Month	Habitat zones	PCA axis 1	PCA axis 2	Siganus fuscescens	Ostorhinchus properuptus	Ostorhinchus ishigakiensis	Lutjanus gibbus	Mulloidichthys flavolineatus	Pomacentrus sp.1	Stethojulis strigiventer	Parupeneus barberinus	Cheilodipterus quinquelineatus	Parupeneus barberinoides	Acanthurus nigrofuscus	Parupeneus multifasciatus	Pterocaesio sp.1	Rhabdamia sp.1	Chrysiptera cyanea	Abudefduf sexfasciatus	Pomacentrus chrysurus	Lethrinus harak	Lethrinus atkinsoni	Dischistodus prosopotaenia	Lutjanus kasmira	Chaetodon auriga	Lethrinus obsoletus	Lethrinus nebulosus	Amblyeleotris sp.1	Parupeneus ciliatus
JUN 2018	SGCO	3.41	0.383	18.3333	21.6667	2.16667	31.1667	0	0	0	0.166667	0.166667	0	0	1.16667	0.833333	0.666667	0	1.66667	0.333333	0.166667	0.166667	0	1.33333	0.166667	0	0	0	0.333333		80.5
JUN 2018	SG	-0.149	-2.46	21.6667	0	0	0	0	0	0	0.166667	0	0	0	0	0	0	0	0	0	0	0	0	0	0	0	0	0	0		21.8333
JUN 2018	CO	-1.87	0.131	0	0	0	0	0	0.5	0	0	0	0	1.83333	0	0	0	0.666667	0	0.166667	0	0	0	0	0.333333	0	0.666667	0	0		4.16667
JUN 2018	SA	-1.85	-0.0259	0	0	0	0.166667	0	0	0	0	0	0	0	0	0	0	0	0	0	0	0	0	0	0	0	0	0	0		0.166667
JUL 2018	SGCO	2.4	1.84	2.16667	12.3333	9.83333	14	0	0.166667	1.33333	0	1	0.166667	0	1.16667	0	0	0	0	0.5	0	0.166667	0	1.83333	0.166667	0.166667	1	0	0		46
JUL 2018	CO	-1.49	0.66	0	1.66667	0	0	0	2.33333	0	0	0	0	0.5	0.166667	0	0	0.5	0	0.166667	0	0	0.833333	0.166667	0.5	0	0.166667	0	0		7
JUL 2018	SA	-1.91	-0.0692	0	0	0	0	0	0	0	0	0	0	0	0	0	0	0	0	0	0	0	0	0	0	0	0	0.166667	0		0.166667
AUG 2018	SGCO	2.84	-0.87	26.6667	1.66667	7.66667	9.66667	0	0	2.33333	4.33333	0.166667	0.5	0	1.83333	0	0	0	0	0.666667	0.5	0.5	0	0.333333	0.5	0	0	0	0		57.3333
AUG 2018	SG	-1.79	0.0807	0	0	0	0	0	0	1.66667	0.166667	0	0	0	0.666667	0	0	0	0	0	0.333333	0	0	0	0	0	0	0	0		2.83333
AUG 2018	CO	-2.04	0.26	0	0	0	0	18.3333	1.5	0	0	0	0	0.166667	0	3.33333	0	0.666667	0	0	0	0	0.166667	0	0.333333	0	0	0	0		24.5
SEP 2018	SGCO	3	0.108	12.3333	7.33333	13.5	5.83333	0	0	2.16667	4.83333	0.166667	0.666667	0	0.333333	0	0	0	0	0.333333	0.166667	0.833333	0.166667	0.666667	0.333333	0.166667	0.166667	0	0		50
SEP 2018	SG	-0.621	-1.78	7.16667	0	0	0	0	0	0	3.66667	0	0	0	0	0	0	0	0	0	0	0	0	0	0	0	0	0	0		10.8333
SEP 2018	CO	-1.52	0.538	0.166667	1.16667	0	0	0.666667	1.66667	0	0	5.5	0	0	0	0	0	0.333333	0	0	0.333333	0	0.333333	0	0.166667	0	0.333333	0	0		10.6667
SEP 2018	SA	-1.91	-0.0681	0	0	0	0	0	0	0	0	0	0	0	0	0	0	0	0	0	0.166667	0	0	0	0	0	0	0.333333	0		0.5
OCT 2018	SGCO	1.28	1.75	0.333333	3.16667	10.6667	8.5	0	0	3.5	0.5	0	0	0	0	0	0	0	0	0.666667	0.166667	0.5	0	0.666667	0.333333	0.333333	0.166667	0	0		29.5
OCT 2018	SG	-1.91	-0.0631	0	0	0	0	0	0	0	0	0	0	0	0	0	0	0	0	0	0.166667	0	0	0	0	0	0	0	0		0.166667
OCT 2018	CO	-1.92	0.211	0	0	0	0	0	1.83333	0	0.166667	1.33333	0	0.333333	0.166667	0	0	0.333333	0	0	0.166667	0	0.333333	0	0.166667	0	0.166667	0	0		5
OCT 2018	SA	-1.92	-0.0716	0	0	0	0	0	0	0	0	0	0	0	0	0	0	0	0	0	0	0	0	0	0	0	0	0.333333	0		0.333333
JUN 2019	SGCO	5.57	-1.11	207.833	55.3333	18.3333	4.66667	0	0.166667	0.333333	0.166667	0.833333	2.5	0.166667	0	1.83333	0	0.5	2.83333	0.333333	0.5	0.833333	0	0	0.5	0.166667	0	0	1.5		299.333
JUN 2019	SG	1.58	-3.95	186.333	0	1.33333	0	0	0	0	0.166667	0	0.666667	0	0	0	0	0	0	0	0	0.666667	0	0	0	1	0	0	0		190.167
JUN 2019	CO	-0.811	1.51	0	12.3333	0	0	0	4.66667	0	0	1.66667	0	0.166667	0	0	0	0.833333	0	0.5	0	0	0.5	0	0	0	0	0	0		20.6667
JUN 2019	SA	-1.45	-0.732	1.33333	0	0	0	0	0	0	0	0	0	0	0	0	0	0	0	0	0	0	0	0	0	0.166667	0	1.16667	0		2.66667
JUL 2019	SGCO	6.1	-0.22	124	42.5	59.3333	12.1667	0	0.166667	0	0.333333	0.5	0.333333	1.16667	0	1.5	7.16667	1.16667	2.66667	0.5	0.333333	0.166667	0.166667	0	0.5	0.333333	0	0	0		255
JUL 2019	SG	1.51	-3.35	82.6667	0	2.66667	0	0	0	0	0.5	0	4.66667	0	0	0	0	0	0	0	0.166667	0.833333	0	0	0	0.833333	0	0	0		92.3333
JUL 2019	CO	-0.566	1.6	0	18.5	0	0	0	2.66667	0	0	1.16667	0	0.666667	0	0.666667	0	0	0	0.5	0.833333	0	0.333333	0	0	0	0	0	1.16667		26.5
JUL 2019	SA	-1.07	-1.21	3.5	0	0	0	0	0	0	0	0	0	0.166667	0	0	0	0	0	0	0	0	0	0	0	0	0	0.666667	0		4.33333
AUG 2019	SGCO	4.12	1.31	11.1667	31.3333	37.1667	9.16667	0	0	0	0.166667	0.666667	1	2.5	1.66667	0	0	0.833333	0.333333	0.333333	0	0.5	0.5	0	0.166667	0.333333	0.166667	0	0.166667		98.1667
AUG 2019	SG	-0.53	-1.79	9.16667	0	0	0	0	0	0.666667	0.5	0	0	0	0	0	0	0	0	0	0.5	0	0	0	0	0	0.333333	0	0		11.1667
AUG 2019	CO	-1.5	0.852	0	2.16667	0	0	2	2.66667	0	0	1.83333	0	0.833333	0.333333	0	0	0	0	0.166667	0	0	0.333333	0	0	0	0	0	0		10.3333
SEP 2019	SGCO	1.8	2.66	0	12.1667	25.8333	3.16667	0	0	3.33333	0	0.166667	0.5	0.5	2	0	0	1.16667	0	0.5	0.333333	0	0.333333	0	0	0.166667	0.333333	0	0.166667		50.6667
SEP 2019	SG	-1.9	-0.0601	0	0	0	0	0	0	0	0	0	0	0	0	0	0	0	0	0	0.333333	0	0	0	0	0	0	0	0		0.333333
SEP 2019	CO	-1.58	0.764	0	2	0	0	6.5	2	0	0	0.166667	0	1	0	0	0	0	0	0.166667	0.5	0	0.333333	0	0.166667	0	0	0	0		12.8333
SEP 2019	SA	-1.92	-0.0755	0	0	0	0	0	0	0	0	0	0	0	0	0	0	0	0	0	0	0	0	0	0	0	0	0.666667	0		0.666667
OCT 2019	SGCO	2.12	2.72	0	11.3333	28.6667	10.5	0	0	1.5	0.333333	0	0.333333	0	0	0	0	0.833333	0	0.833333	0.5	0	0.166667	0	0.5	0.166667	0	0	0		55.6667
OCT 2019	CO	-1.57	0.593	0	1.33333	0	0	0.166667	1.83333	0	0	0.666667	0	0.666667	0.166667	0	0	0	0	0.333333	0.166667	0	0.5	0	0	0	0	0	0		5.83333
OCT 2019	SA	-1.91	-0.0692	0	0	0	0	0	0	0	0	0	0	0	0	0	0	0	0	0	0	0	0	0	0	0	0	0.166667	0		0.166667
