# Supplementary material for: Co-occurrence of seagrass vegetation and coral colonies supports unique fish assemblages: a microhabitat-scale perspective
Source: PeerJ. 2022 Nov 23;10:e14466. doi: 10.7717/peerj.14466 (PMC9700455; doi:10.7717/peerj.14466)
Supplement: Supplemental Information 6 [file peerj-10-14466-s006.xls]

## Sheet: Sheet1
Ostorhinchus ishigakiensis
	CO	CO		SGCO	SGCO		SG		SA
Total length (cm)	Coral	Sandy bottom		Coral	Seagrass vegetation
1-1.5	0	0		0	0		0		0
2-2.5	0	0		14	0		0		0
3-3.5	0	0		245	0		8		0
4-4.5	0	0		576	0		8		0
5-5.5	0	0		440	0		8		0
6-6.5	0	0		4	0		0		0
7-7.5	0	0		0	0		0		0
8-8.5	0	0		0	0		0		0
9-9.5	0	0		0	0		0		0
10-10.5	0	0		0	0		0		0
Lutjanus gibbus
	CO	CO		SGCO	SGCO		SG		SA
Total length (cm)	Coral	Sandy bottom		Coral	Seagrass vegetation
1-1.5	0	0		0	0		0		0
2-2.5	0	0		0	0		0		0
3-3.5	0	0		0	0		8		0
4-4.5	0	0		517	20		8		1
5-5.5	0	0		38	0		8		0
6-6.5	0	0		45	1		0		0
7-7.5	0	0		17	7		0		0
8-8.5	0	0		3	1		0		0
9-9.5	0	0		0	0		0		0
10-10.5	0	0		3	0		0		0
11-11.5	0	0		0	0				0
12-12.5	0	0		1	0				0
Rhabdamia sp.1
	CO	CO		SGCO	SGCO		SG		SA
Total length (cm)	Coral	Sandy bottom		Coral	Seagrass vegetation
1-1.5	0	0		0	0		0		0
2-2.5	0	0		0	0		0		0
3-3.5	0	0		0	0		0		0
4-4.5	0	0		0	0		0		0
5-5.5	0	0		0	0		0		0
6-6.5	0	0		7	0		0		0
7-7.5	0	0		40	0		0		0
8-8.5	0	0		0	0		0		0
9-9.5	0	0		0	0		0		0
10-10.5	0	0		0	0		0		0
Abudefduf sexfasciatus
	CO	CO		SGCO	SGCO		SG		SA
Total length (cm)	Coral	Sandy bottom		Coral	Seagrass vegetation
1-1.5	0	0		0	0		0		0
2-2.5	0	0		0	0		0		0
3-3.5	0	0		26	0		0		0
4-4.5	0	0		17	0		0		0
5-5.5	0	0		2	0		0		0
6-6.5	0	0		0	0		0		0
7-7.5	0	0		0	0		0		0
8-8.5	0	0		0	0		0		0
9-9.5	0	0		0	0		0		0
10-10.5	0	0		0	0		0		0
Lutjanus kasmira
	CO	CO		SGCO	SGCO		SG		SA
Total length (cm)	Coral	Sandy bottom		Coral	Seagrass vegetation
1-1.5	0	0		0	0		0		0
2-2.5	0	0		0	0		0		0
3-3.5	0	0		0	0		0		0
4-4.5	0	0		16	0		0		0
5-5.5	0	0		2	0		0		0
6-6.5	0	0		2	0		0		0
7-7.5	0	0		2	0		0		0
8-8.5	0	0		1	0		0		0
9-9.5	0	0		0	0		0		0
10-10.5	0	0		0	0		0		0
11-11.5	0	0		2	0		0		0
12-12.5	0	0		4	0		0		0
Parupeneus multifasciatus
	CO	CO		SGCO	SGCO		SG		SA
Total length (cm)	Coral	Sandy bottom		Coral	Seagrass vegetation
1-1.5	0	0		0	0		0		0
2-2.5	0	0		0	0		0		0
3-3.5	0	0		0	0		0		0
4-4.5	0	0		0	1		0		0
5-5.5	0	1		0	3		0		0
6-6.5	0	0		7	7		4		0
7-7.5	0	0		5	23		0		0
8-8.5	0	0		0	0		0		0
9-9.5	0	2		2	0		0		0
10-10.5	0	0		0	0		0		0
11-11.5	0	0		0	0		0		0
12-12.5	0	0		0	0		0		0
13-13.5	0	1		0	0		0		0
14-14.5	0	0		0	0		0		0
15-15.5	0	1		1	0		0		0
