# Supplementary material for: Co-occurrence of seagrass vegetation and coral colonies supports unique fish assemblages: a microhabitat-scale perspective
Source: PeerJ. 2022 Nov 23;10:e14466. doi: 10.7717/peerj.14466 (PMC9700455; doi:10.7717/peerj.14466)
Supplement: Supplemental Information 7 [file peerj-10-14466-s007.xls]

## Sheet: Sheet1
Siganus fuscescens
	CO	CO		SGCO	SGCO		SG		SA
Total length (cm)	Coral	Sandy bottom		Coral	Seagrass vegetation
1-1.5	0	0		0	0		0		0
2-2.5	0	0		27	0		0		0
3-3.5	0	0		121	1989		1720		5
4-4.5	0	0		29	149		63		13
5-5.5	0	0		5	73		19		6
6-6.5	0	0		0	16		40		5
7-7.5	0	0		0	8		0		0
8-8.5	0	0		0	0		0		0
9-9.5	0	0		0	0		0		0
10-10.5	0	1		0	0		0		0
Lethrinus obsoletus
	CO	CO		SGCO	SGCO		SG		SA
Total length (cm)	Coral	Sandy bottom		Coral	Seagrass vegetation
1-1.5	0	0		0	0		0		0
2-2.5	0	0		0	0		0		0
3-3.5	0	0		0	1		2		0
4-4.5	0	0		0	0		4		1
5-5.5	0	0		0	4		0		0
6-6.5	0	0		0	2		1		0
7-7.5	0	0		0	2		4		0
8-8.5	0	0		0	0		0		0
9-9.5	0	0		0	1		0		0
10-10.5	0	0		0	0		0		0
11-11.5	0	0		0	0		0		0
12-12.5	0	0		0	0		0		0
13-13.5	0	0		0	1		0		0
Parupeneus barberinoides
	CO	CO		SGCO	SGCO		SG		SA
Total length (cm)	Coral	Sandy bottom		Coral	Seagrass vegetation
1-1.5	0	0		0	0		0		0
2-2.5	0	0		0	0		0		0
3-3.5	0	0		0	1		0		0
4-4.5	0	0		0	5		22		0
5-5.5	0	0		3	2		2		0
6-6.5	0	0		3	14		2		0
7-7.5	0	0		0	2		6		0
8-8.5	0	0		0	0		0		0
9-9.5	0	0		0	0		0		0
10-10.5	0	0		2	0		0		0
Parupeneus barberinus
	CO	CO		SGCO	SGCO		SG		SA
Total length (cm)	Coral	Sandy bottom		Coral	Seagrass vegetation
1-1.5	0	0		0	0		0		0
2-2.5	0	0		0	0		0		0
3-3.5	0	0		0	0		0		0
4-4.5	0	0		0	0		1		0
5-5.5	0	0		1	7		1		0
6-6.5	0	0		20	4		22		0
7-7.5	0	0		3	23		6		0
8-8.5	0	0		1	3		1		0
9-9.5	0	0		0	0		0		0
10-10.5	0	0		1	1		0		0
11-11.5	0	0		0	0		0		0
12-12.5	0	0		0	0		0		0
13-13.5	0	0		0	1		0		0
14-14.5	0	0		0	0		0		0
15-15.5	0	0		0	0		0		0
16-16.5	0	0		0	0		0		0
17-17.5	0	0		0	0		0		0
18-18.5	0	0		0	0		0		0
19-19.5	0	0		0	0		0		0
20-20.5	0	1		0	0		0		0
Stethojulis strigiventer
	CO	CO		SGCO	SGCO		SG		SA
Total length (cm)	Coral	Sandy bottom		Coral	Seagrass vegetation
1-1.5	0	0		0	0		0		0
2-2.5	0	0		0	0		0		0
3-3.5	0	0		0	0		0		0
4-4.5	0	0		2	8		0		0
5-5.5	0	0		16	0		10		0
6-6.5	0	0		8	20		0		0
7-7.5	0	0		12	16		0		0
8-8.5	0	0		4	0		0		0
9-9.5	0	0		0	0		0		0
10-10.5	0	0		1	0		4		0
Lethrinus atkinsoni
	CO	CO		SGCO	SGCO		SG		SA
Total length (cm)	Coral	Sandy bottom		Coral	Seagrass vegetation
1-1.5	0	0		0	0		0		0
2-2.5	0	0		0	0		0		0
3-3.5	0	0		0	0		2		0
4-4.5	0	0		1	4		7		0
5-5.5	0	0		1	5		0		0
6-6.5	0	0		2	2		0		0
7-7.5	0	0		2	1		0		0
8-8.5	0	0		1	0		0		0
9-9.5	0	0		1	0		0		0
10-10.5	0	0		2	0		0		0
