# Supplementary material for: Co-occurrence of seagrass vegetation and coral colonies supports unique fish assemblages: a microhabitat-scale perspective
Source: PeerJ. 2022 Nov 23;10:e14466. doi: 10.7717/peerj.14466 (PMC9700455; doi:10.7717/peerj.14466)
Supplement: Supplemental Information 8 [file peerj-10-14466-s008.xls]

## Sheet: Sheet1
Ostorhinchus properuptus
	CO	CO		SGCO	SGCO		SG		SA
Total length (cm)	Coral	Sandy bottom		Coral	Seagrass vegetation
1-1.5	0	0		0	0		0		0
2-2.5	44	0		0	0		0		0
3-3.5	108	0		100	0		0		0
4-4.5	55	0		263	0		0		0
5-5.5	22	0		721	0		0		0
6-6.5	4	0		109	0		0		0
7-7.5	2	0		0	0		0		0
8-8.5	0	0		0	0		0		0
9-9.5	0	0		0	0		0		0
10-10.5	0	0		0	0		0		0
Cheilodipterus quinquelineatus
	CO	CO		SGCO	SGCO		SG		SA
Total length (cm)	Coral	Sandy bottom		Coral	Seagrass vegetation
1-1.5	0	0		0	0		0		0
2-2.5	40	0		0	0		0		0
3-3.5	19	0		0	0		0		0
4-4.5	4	0		4	0		0		0
5-5.5	5	0		2	0		0		0
6-6.5	2	0		7	0		0		0
7-7.5	3	0		4	0		0		0
8-8.5	1	0		2	0		0		0
9-9.5	0	0		1	0		0		0
10-10.5	0	0		2	0		0		0
11-11.5	0	0		0	0		0		0
12-12.5	0	0		0	0		0		0
Chrysiptera cyanea
	CO	CO		SGCO	SGCO		SG		SA
Total length (cm)	Coral	Sandy bottom		Coral	Seagrass vegetation
1-1.5	0	0		0	0		0		0
2-2.5	7	0		2	0		0		0
3-3.5	10	0		1	0		0		0
4-4.5	3	0		13	0		0		0
5-5.5	0	0		11	0		0		0
6-6.5	0	0		0	0		0		0
7-7.5	0	0		0	0		0		0
8-8.5	0	0		0	0		0		0
9-9.5	0	0		0	0		0		0
10-10.5	0	0		0	0		0		0
Pomacentrus chrysurus
	CO	CO		SGCO	SGCO		SG		SA
Total length (cm)	Coral	Sandy bottom		Coral	Seagrass vegetation
1-1.5	1	0		0	0		0		0
2-2.5	3	0		3	0		0		0
3-3.5	5	0		3	0		0		0
4-4.5	3	0		7	0		0		0
5-5.5	0	0		8	0		0		0
6-6.5	0	0		8	0		0		0
7-7.5	0	0		1	0		0		0
8-8.5	0	0		0	0		0		0
9-9.5	0	0		0	0		0		0
10-10.5	0	0		0	0		0		0
Parupeneus ciliatus
	CO	CO		SGCO	SGCO		SG		SA
Total length (cm)	Coral	Sandy bottom		Coral	Seagrass vegetation
1-1.5	0	0		0	0		0		0
2-2.5	0	0		0	0		0		0
3-3.5	0	0		0	0		0		0
4-4.5	0	0		1	0		0		0
5-5.5	0	0		1	0		0		0
6-6.5	0	0		0	0		0		0
7-7.5	0	0		3	0		0		0
8-8.5	0	0		2	0		0		0
9-9.5	0	0		0	0		0		0
10-10.5	2	0		2	0		0		0
11-11.5	0	0		0	0		0		0
12-12.5	5	0		1	0		0		0
13-13.5	0	0		3	0		0		0
Acanthurus nigrofuscus
	CO	CO		SGCO	SGCO		SG		SA
Total length (cm)	Coral	Sandy bottom		Coral	Seagrass vegetation
1-1.5	0	0		0	0		0		0
2-2.5	0	0		0	0		0		0
3-3.5	1	0		11	0		0		0
4-4.5	6	0		13	0		0		1
5-5.5	9	0		1	0		0		0
6-6.5	6	0		0	0		0		0
7-7.5	1	0		1	0		0		0
8-8.5	2	0		0	0		0		0
9-9.5	1	0		0	0		0		0
10-10.5	0	0		0	0		0		0
11-11.5	0	0		0	0		0		0
12-12.5	1	0		0	0		0		0
13-13.5	5	0		0	0		0		0
14-14.5	1	0		0	0		0		0
15-15.5	1	0		0	0		0		0
16-16.5	0	0		0	0		0		0
17-17.5	0	0		0	0		0		0
18-18.5	1	0		0	0		0		0
19-19.5	0	0		0	0		0		0
20-20.5	2	0		0	0		0		0
Dischistodus prosopotaenia
	CO	CO		SGCO	SGCO		SG		SA
Total length (cm)	Coral	Sandy bottom		Coral	Seagrass vegetation
1-1.5	2	0		0	0		0		0
2-2.5	1	0		0	0		0		0
3-3.5	3	0		4	0		0		0
4-4.5	1	0		4	0		0		0
5-5.5	1	0		0	0		0		0
6-6.5	3	0		0	0		0		0
7-7.5	4	0		0	0		0		0
8-8.5	1	0		0	0		0		0
9-9.5	1	0		0	0		0		0
10-10.5	4	0		0	0		0		0
11-11.5	1	0		0	0		0		0
Chaetodon auriga
	CO	CO		SGCO	SGCO		SG		SA
Total length (cm)	Coral	Sandy bottom		Coral	Seagrass vegetation
1-1.5	0	0		0	0		0		0
2-2.5	2	0		5	0		0		0
3-3.5	1	0		7	0		0		0
4-4.5	0	0		1	0		0		1
5-5.5	0	0		0	0		0		0
6-6.5	0	0		0	0		0		0
7-7.5	0	0		0	0		0		0
8-8.5	0	0		0	0		0		0
9-9.5	0	0		0	0		0		0
10-10.5	0	0		0	0		0		0
11-11.5	0	0		0	0		0		0
12-12.5	0	0		0	0		0		0
13-13.5	1	0		0	0		0		0
14-14.5	0	0		0	0		0		0
15-15.5	0	0		1	0		0		0
16-16.5	0	0		0	0		0		0
17-17.5	0	0		0	0		0		0
18-18.5	3	0		0	0		0		0
19-19.5	0	0		0	0		0		0
20-20.5	2	0		5	0		0		0
Precaesio sp.1
	CO	CO		SGCO	SGCO		SG		SA
Total length (cm)	Coral	Sandy bottom		Coral	Seagrass vegetation
1-1.5	0	0		0	0		0		0
2-2.5	0	0		0	0		0		0
3-3.5	4	0		9	0		0		0
4-4.5	0	0		0	0		0		1
5-5.5	0	0		7	0		0		0
6-6.5	0	0		9	0		0		0
7-7.5	0	0		0	0		0		0
8-8.5	0	0		0	0		0		0
9-9.5	0	0		0	0		0		0
10-10.5	0	0		0	0		0		0
11-11.5	0	0		0	0		0		0
12-12.5	0	0		0	0		0		0
13-13.5	0	0		0	0		0		0
14-14.5	0	0		0	0		0		0
15-15.5	0	0		0	0		0		0
16-16.5	0	0		0	0		0		0
17-17.5	0	0		0	0		0		0
18-18.5	0	10		0	0		0		0
19-19.5	0	0		0	0		0		0
20-20.5	0	10		0	0		0		0
