# Supplementary material for: Co-occurrence of seagrass vegetation and coral colonies supports unique fish assemblages: a microhabitat-scale perspective
Source: PeerJ. 2022 Nov 23;10:e14466. doi: 10.7717/peerj.14466 (PMC9700455; doi:10.7717/peerj.14466)
Supplement: Supplemental Information 9 [file peerj-10-14466-s009.xls]

## Sheet: Sheet1
Lethrinus harak
	CO	CO		SGCO	SGCO		SG		SA
Total length (cm)	Coral	Sandy bottom		Coral	Seagrass vegetation
5-5.5	0	0		0	0		0		0
6-6.5	0	0		0	0		0		1
7-7.5	0	0		0	2		0		0
8-8.5	0	2		0	0		0		0
9-9.5	0	0		0	0		1		0
10-10.5	0	0		0	0		2		0
11-11.5	0	0		0	0		0		0
12-12.5	0	0		0	0		0		0
13-13.5	0	0		0	0		0		0
14-14.5	0	0		0	0		0		0
15-15.5	0	1		0	0		0		0
16-16.5	0	0		0	0		0		0
17-17.5	0	0		0	0		0		0
18-18.5	0	4		0	0		0		0
19-19.5	0	0		0	0		0		0
20-20.5	0	0		0	1		0		0
21-21.5	0	0		0	0		1		0
22-22.5	0	2		0	0		0		0
23-23.5	0	2		0	0		0		0
24-24.5	0	0		0	0		0		0
25-25.5	0	1		0	9		4		0
26-26.5	0	0		0	0		0		0
27-27.5	0	0		0	0		1		0
28-28.5	0	0		0	0		0		0
29-29.5	0	0		0	0		0		0
30-30.5	0	0		0	2		0		0
Lethrinus nebulosus
	CO	CO		SGCO	SGCO		SG		SA
Total length (cm)	Coral	Sandy bottom		Coral	Seagrass vegetation
5-5.5	0	0		1	0		0		0
6-6.5	0	0		2	0		1		0
7-7.5	0	0		0	2		0		0
8-8.5	0	2		5	0		0		0
9-9.5	0	0		0	0		0		0
10-10.5	0	0		0	1		1		0
11-11.5	0	0		0	0		0		0
12-12.5	0	0		0	0		0		0
13-13.5	0	0		0	0		0		0
14-14.5	0	0		0	0		0		0
15-15.5	0	1		0	0		0		0
16-16.5	0	0		0	0		0		0
17-17.5	0	0		0	0		0		0
18-18.5	0	1		0	0		0		0
19-19.5	0	0		0	0		0		0
20-20.5	0	4		0	0		0		0
